# Supplementary material
Source: PubMed Central journal article supplement (PMC4392921)

SUPPLEMENTARY DATA

**Supplementary Table 1.** Information on DRB1\*04:01 type 1 diabetic subjects used for study.

| Subject ID | Age <sup>a</sup> | Gender <sup>b</sup> | Time since diagnosis <sup>c</sup> | Auto-antibodies <sup>d</sup> |
|------------|------------------|---------------------|-----------------------------------|------------------------------|
| T1D #1     | 17               | M                   | 7.8 years                         | GAD                          |
| T1D #2     | 34               | F                   | 5.0 years                         | GAD, IAA                     |
| T1D #3     | 18               | M                   | 1.6 years                         | GAD, IAA                     |
| T1D #4     | 63               | F                   | 3.3 years                         | IAA                          |
| T1D #5     | 31               | M                   | 5.6 years                         | GAD, IAA, IA2, ZnT8          |
| T1D #6     | 22               | F                   | 3.3 years                         | GAD, IAA                     |
| T1D #7     | 26               | F                   | 6.3 years                         | GAD, IAA, IA2                |
| T1D #8     | 25               | F                   | 8.2 years                         | GAD, IAA, IA2, ZnT8          |
| T1D #9     | 17               | M                   | 5.4 years                         | IAA, IA2                     |
| T1D #10    | 24               | M                   | 3.2 years                         | GAD, IAA, IA2, ZnT8          |
| T1D #11    | 27               | M                   | 4.2 years                         | GAD, IAA, IA2, ZnT8          |
| T1D #12    | 29               | M                   | 2.1 years                         | GAD, IAA                     |
| T1D #13    | 32               | M                   | 3.2 years                         | GAD, IAA, IA2, ZnT8          |
| T1D #14    | 26               | F                   | 2.0 years                         | GAD, IAA, IA2, ZnT8          |
| T1D #15    | 45               | M                   | 0.7 years                         | GAD                          |
| T1D #16    | 10               | M                   | 2.6 years                         | GAD, IAA, IA2, ZnT8          |

<sup>a</sup> The mean age was 27.9 years.

<sup>b</sup> The male to female ratio of the cohort was 10:6.

<sup>c</sup> The average time since diagnosis was 4 years.

<sup>d</sup> GAD denotes glutamic acid decarboxylase 65, IAA denotes insulin, IA2 denotes tyrosine phosphatase-related islet antigen 2, ZnT8 denotes zinc transporter 8

SUPPLEMENTARY DATA

**Supplementary Table 2.** Information on DRB1\*04:01 healthy subjects used for study.

| Subject ID  | Age <sup>a</sup> | Gender <sup>b</sup> | Auto-antibodies <sup>c</sup> |
|-------------|------------------|---------------------|------------------------------|
| Control #1  | 57               | F                   | N/A                          |
| Control #2  | 34               | F                   | N/A                          |
| Control #3  | 20               | F                   | N/A                          |
| Control #4  | 33               | F                   | N/A                          |
| Control #5  | 40               | M                   | N/A                          |
| Control #6  | 27               | F                   | N/A                          |
| Control #7  | 33               | M                   | N/A                          |
| Control #8  | 28               | F                   | N/A                          |
| Control #9  | 44               | M                   | N/A                          |
| Control #10 | 54               | M                   | N/A                          |
| Control #11 | 23               | M                   | N/A                          |
| Control #12 | 40               | M                   | N/A                          |
| Control #13 | 60               | F                   | N/A                          |
| Control #14 | 39               | M                   | N/A                          |
| Control #15 | 61               | F                   | N/A                          |
| autoAb+ #1  | 54               | M                   | GAD                          |
| autoAb+ #2  | 19               | F                   | GAD, IAA                     |
| autoAb+ #3  | 29               | M                   | GAD, IAA                     |
| autoAb+ #4  | 43               | F                   | GAD, IAA                     |
| autoAb+ #5  | 40               | F                   | GAD, IAA                     |
| autoAb+ #6  | 40               | M                   | GAD                          |

<sup>a</sup> The mean age of auto-antibody negative and auto-antibody positive controls was 39.5 and 37.5 years, respectively.

<sup>b</sup> The male to female ratio for auto-antibody negative and auto-antibody positive controls was 7:8 and 3:3, respectively.

<sup>c</sup> GAD denotes glutamic acid decarboxylase 65, IAA denotes insulin

SUPPLEMENTARY DATA

**Supplementary Table 3.** Sequences and binding affinities for peptides that bind DR\*0401.

| Peptide <sup>a</sup>     | Modification <sup>b</sup> | Sequence              | Modified IC <sub>50</sub> (μM) |
|--------------------------|---------------------------|-----------------------|--------------------------------|
| GAD 73-92                | 77E                       | CACDEKPCSCSKVDVNYAFL  | 5.02                           |
| GAD115-127 <sup>a</sup>  | 120E                      | MNILLEVVVKSFD         | 0.20                           |
| GAD 153-172 <sup>a</sup> | 154E, 164E                | PENLEEILMHCETTLKYAIK  | 12.79                          |
| GAD 177-196              | 181E                      | RYFNELSTGLDMVGLAADWL  | 2.70                           |
| GAD 321-340              | 324E                      | EAKEKGFVPFLVSATAGTTV  | 5.09                           |
| GAD 89-108 <sup>a</sup>  | 105X                      | YAFLHATDLLPACDGEXPTL  | 2.88                           |
| GAD 265-284 <sup>a</sup> | 272X                      | KGMAALPXLIIFTSEHSHFS  | 0.81                           |
| GAD 377-396              | 386X                      | HKWKLSGVEXANSVTWNPHK  | 7.94                           |
| GAD 441-456              | 448X                      | DKALQCGXHVDVFKLWLMW   | 20.55                          |
| GAD 473-492              | 488X                      | KCLELAEYLYNIIKNXEGYE  | 0.89                           |
| GAD 481-500              | 488X                      | LYNIIKNXEGYEMVFDGKPKQ | 3.81                           |
| GAD 505-524              | 514X, 522X                | CFWYIPPSLXTLEDNEEXMS  | 3.30                           |
| GAD 529-548              | 536X                      | VAPVIKAXMMEYGTTMVSQ   | 5.23                           |
| GAD 545-564              | 558X                      | VSYQPLGDKVNFFXMVISNP  | 8.07                           |
| GAD 553-572 <sup>a</sup> | 558X                      | KVNFFXMVISNPAATHQDID  | 0.04                           |

<sup>a</sup> indicates peptides that were shown to be immunogenic

<sup>b</sup> X denotes a citrullination, E denotes a transglutamination.

SUPPLEMENTARY DATA

**Supplementary Figure 1.** Binding affinity curves of modified GAD65 epitopes found to elicit *in vitro* T cell responses. Increasing concentrations of each modified GAD peptide were bound to DR0401 protein in competition with a biotinylated reference peptide. IC<sub>50</sub> values were determined as the concentration of peptide needed to displace 50% of the reference peptide. A lower IC<sub>50</sub> value indicates stronger binding.

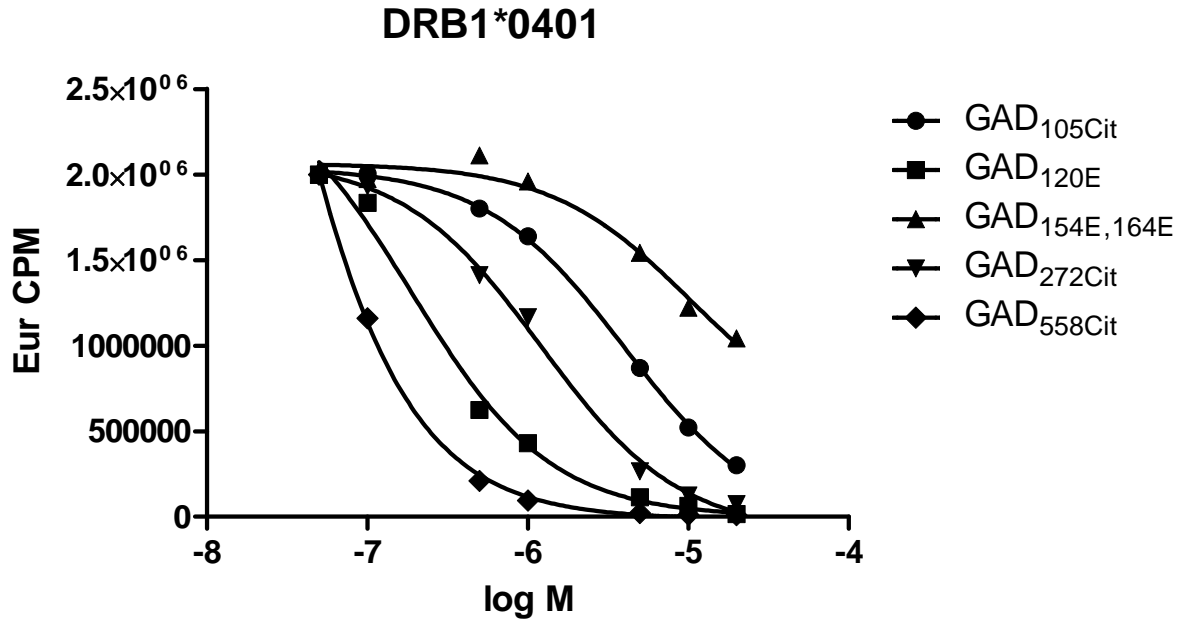

SUPPLEMENTARY DATA

**Supplementary Figure 2.** Direct ex vivo analysis of T cells specific for modified GAD65 epitopes. A magnetic enrichment procedure was used to visualize T cells specific for modified GAD65 epitopes directly ex vivo. PBMCs were isolated and co-stained *ex vivo* with tetramer and surface antibodies. Each upper panel shows a pre-column fraction, which is used to determine the total number of CD4+ T cells in the unmanipulated sample. Each lower panel shows the corresponding PE enriched fraction, which is used to determine the total number of epitope specific CD4+ T cells in the sample. Cells were gated based on size, viability and lack of CD14/CD19 expression, CD4 expression, and then displayed on a CD45RO versus tetramer plot as shown.

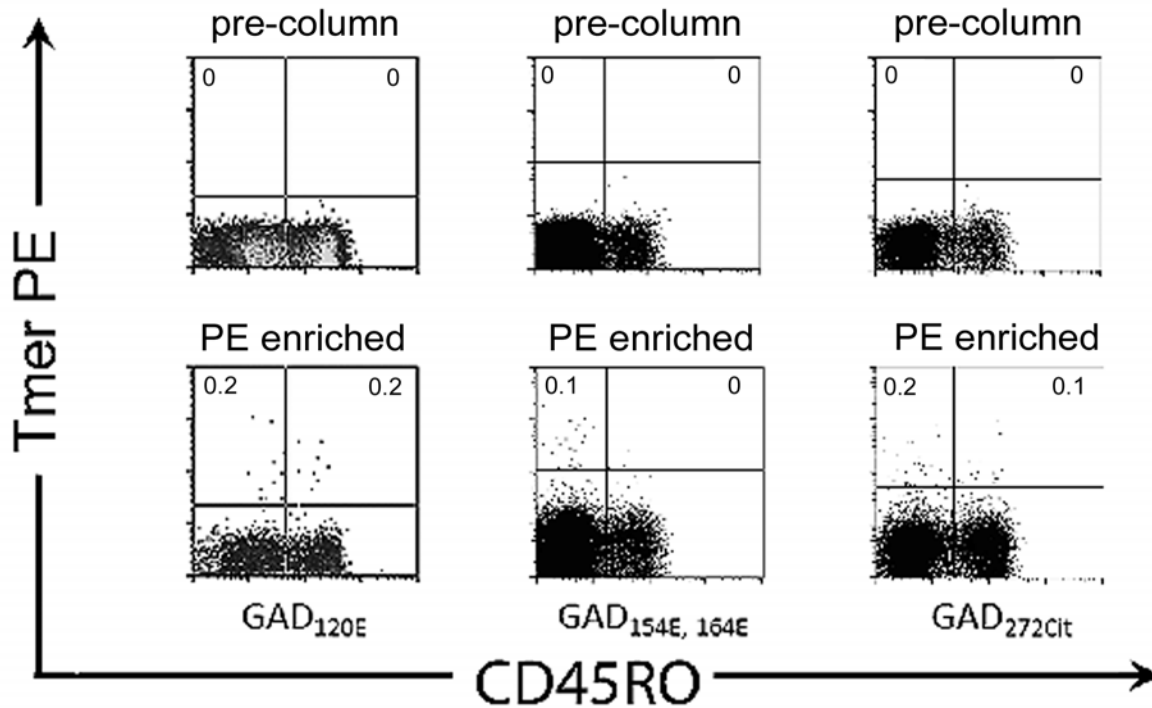

SUPPLEMENTARY DATA

**Supplementary Figure 3.** Intra-cellular cytokine profiling of PTM specific T cell clones. T cell clones that recognize modified GAD65 epitopes were activated using PMA/ionomycin, and analyzed for intracellular cytokine content by flow cytometry in the presence Brefeldin A. (A) Intracellular cytokine staining results for a representative T cell clone (specific for GAD<sub>120E</sub>) gated based on size and positive tetramer staining. (B) Cumulative cytokine profiling data for six T cell clones: 3 pairs of clones specific for GAD<sub>154E,164E</sub> (clones 1 and 2), GAD<sub>272Cit</sub> (clones 3 and 4), and GAD<sub>120E</sub> (clones 5 and 6).

A

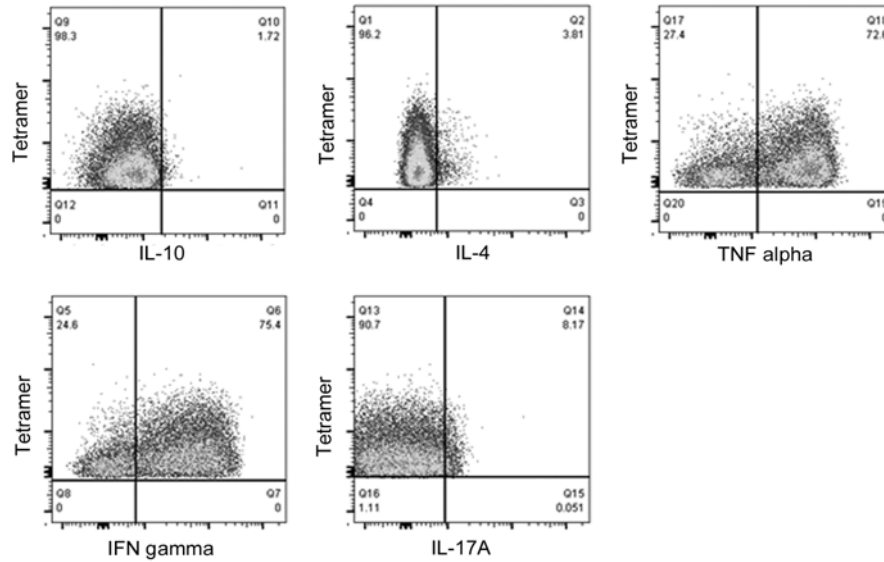

B

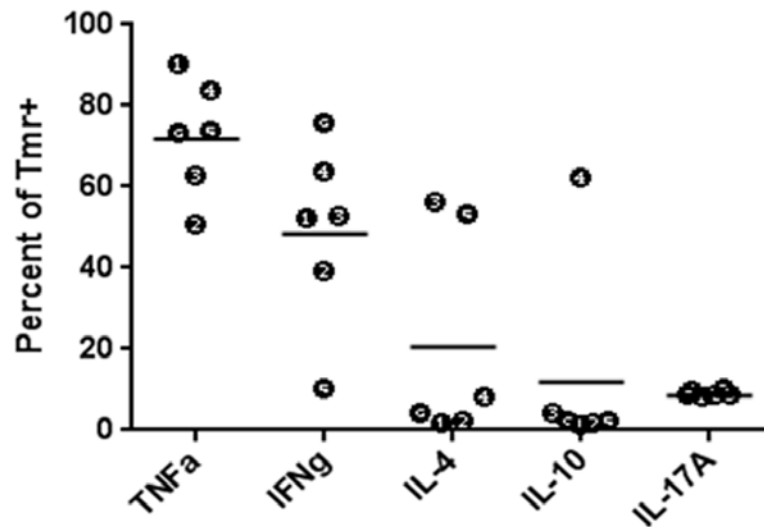

Supplement: supp_db13-1952_DB131952SupplementaryData.pdf [file supp_db13-1952_DB131952SupplementaryData.pdf]
